# Supplementary material for: A computational study on the coordination modes and electron absorption spectra of the complexes U(iv) with N,N,N′,N′-tetramethyl-diglycolamide and anions
Source: Royal Society of Chemistry journal article supplement (doi:10.1039/d3ra04206e), 2023-01-01
Supplement: d3ra04206e1.pdf [file d3ra04206e1.pdf]

*Electronic Supplementary Information for*

## A computational study on the coordination modes and electron absorption spectra of the complexes U(IV) with N, N, N', N'-tetramethyl-diglycolamide and anions

Yating Yang, Youshi Lan, Qian Liu, Liyang Zhu, Xuan Hao, Jin Zhou, Suliang Yang\*, Guoxin Tian\*

Department of Radiochemistry, China Institute of Atomic Energy, Beijing 102413

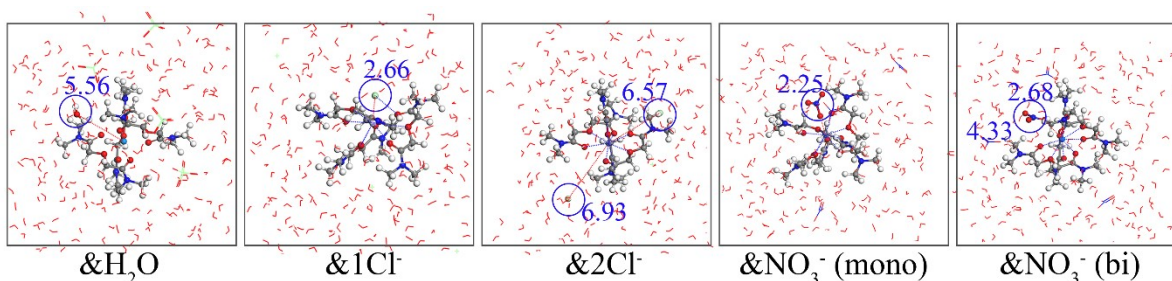

**Figure S1.** Snapshot of geometry for U(IV)-TMDGA complexes with and without water and counterions Cl<sup>-</sup>, NO<sub>3</sub><sup>-</sup> during AIMD after 1 ps. The water cube contains more than 200 water molecules with cubic parameters at 20 Å to mimic the real solvent condition, also, the counterions are replenished to keep electroneutrality. The red, white, blue, dark blue and green ball represents oxygen, hydrogen, uranium, nitrogen and chloride atoms. The distance of U-Cl in &2Cl<sup>-</sup> system is far away from the maximum limit for coordination, as well as the U-O(H<sub>2</sub>O) distance in &H<sub>2</sub>O system.

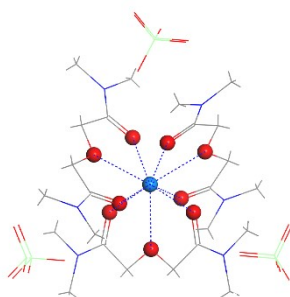

**Figure S2.** Geometric schematic diagram of non-ligand U(IV)-TMDGA complexes, with 3 perchlorate ions (ClO<sub>4</sub><sup>-</sup>) symmetrically introduced in non-ligand U(IV)-TMDGA complex in the outer coordination sphere to mimic the real condition. The red and blue ball represents the oxygen and uranium atom, and the green dot is for chloride. Three ClO<sub>4</sub><sup>-</sup>s are placed in three corners.

**Table S1.** Comparison of calculated (Calc.) and experimental (Exp.) absorption spectra<sup>1</sup> of U(IV)-TMDGA complexes with and without counterions, as well as the assignment of excited states. TMDGA represents the pure U(IV)-TMDGA complex, the &Cl<sup>-</sup>, &NO<sub>3</sub><sup>-</sup>(mono) and &NO<sub>3</sub><sup>-</sup>(bi) represents TMDGA-U(IV) complexes with counterions.

| Spectral Branches                                                                   | Degeneracy | peak             | Wavelength (nm)               |        |                  |                                      |                                    | Excited states |
|-------------------------------------------------------------------------------------|------------|------------------|-------------------------------|--------|------------------|--------------------------------------|------------------------------------|----------------|
|                                                                                     |            |                  | Exp. <sup>1</sup>             |        | Calc.            |                                      |                                    |                |
|                                                                                     |            |                  | &NO <sub>3</sub> <sup>-</sup> | TMDGA  | &Cl <sup>-</sup> | &NO <sub>3</sub> <sup>-</sup> (mono) | &NO <sub>3</sub> <sup>-</sup> (bi) |                |
| <sup>3</sup> H <sub>4</sub>                                                         | 9          |                  |                               | ∞      | ∞                | ∞                                    | ∞                                  | 0-8            |
| <sup>3</sup> F <sub>2</sub>                                                         | 5          |                  |                               | 5000.0 |                  |                                      |                                    | 9-13           |
|                                                                                     |            |                  |                               | 4400.0 | 5400.7           | 4873.7                               | 5327.0                             | 4806.5         |
| <sup>3</sup> H <sub>5</sub>                                                         | 11         |                  |                               | 2288.6 | 2555.3           | 2459.3                               | 2376.9                             | 14-24          |
|                                                                                     |            |                  |                               |        | 2236.7           | 2143.5                               | 2242.7                             |                |
| <sup>3</sup> F <sub>3</sub> <sup>3</sup> F <sub>4</sub>                             | 16         |                  |                               | 1440.3 | 1442.6           | 1422.6                               | 1397.5                             | 25-40          |
|                                                                                     |            |                  |                               | 1350.8 | 1326.2           | 1364.1                               | 1351.5                             |                |
|                                                                                     |            |                  |                               | 1107.5 | 1152.4           |                                      | 1103.6                             | 41-53          |
|                                                                                     |            |                  |                               | 1065.8 | 1088.0           | 1143.2                               | 1030.1                             |                |
| <sup>3</sup> H <sub>6</sub>                                                         | 13         |                  |                               | 998.8  | 1000.3           |                                      | 983.5                              |                |
|                                                                                     |            |                  |                               | 964.9  | 973.4            | 1086.9                               | 933.5                              |                |
|                                                                                     |            |                  |                               | 916.6  | 946.1            | 917.5                                | 905.9                              |                |
|                                                                                     |            |                  |                               |        | 715.8            | 695.2                                | 700.9                              | 54-68          |
| <sup>3</sup> P <sub>0</sub> <sup>1</sup> D <sub>2</sub> <sup>1</sup> G <sub>4</sub> | 15         | a/a <sub>0</sub> | 670.0                         |        |                  |                                      |                                    |                |
|                                                                                     |            | b/b <sub>0</sub> | 659.3                         | 709.8  | 696.1            | 672.9                                | 685.7                              |                |
|                                                                                     |            | c/c <sub>0</sub> | 653.0                         | 695.2  | 679.3            | 661.5                                | 672.9                              |                |
|                                                                                     |            | d/d <sub>0</sub> | 625.8                         |        | 661.5            | 650.4                                | 658.9                              |                |
| <sup>3</sup> P <sub>1</sub>                                                         | 3          | e/e <sub>0</sub> | 551.3                         | 561.4  | 567.8            | 554.7                                | 559.0                              | 69-71          |
|                                                                                     |            | f/f <sub>0</sub> | 541.0                         | 551.6  | 551.0            | 541.6                                | 541.0                              |                |
| <sup>1</sup> I <sub>6</sub>                                                         | 13         | g/g <sub>0</sub> | 491.5                         | 491.5  | 473.5            | 479.8                                | 478.5                              | 72-84          |
|                                                                                     |            | h/h <sub>0</sub> | 477.3                         | 477.1  | 454.4            | 471.8                                | 469.1                              |                |
|                                                                                     |            | i/i <sub>0</sub> | 465.8                         | 467.4  | 444.4            | 447.9                                | 445.9                              |                |
| <sup>3</sup> P <sub>2</sub>                                                         | 5          | j/j <sub>0</sub> | 432.5                         | 442.4  | 429.3            | 426.0                                | 418.2                              | 85-89          |
|                                                                                     |            | k/k <sub>0</sub> | 418.0                         | 402.2  | 416.2            | 407.4                                | 400.6                              |                |
| <sup>1</sup> S <sub>0</sub>                                                         | 1          |                  |                               | 356.3  | 225.4            | 225.0                                | 224.3                              | 90             |

## References

- [1] Q. Liu, J. Zhou, L. Zhu, D. Li, Y. Zhang, S. Yang and G. Tian, The complexation of U(IV) ion with N, N', N'-Tetraalkyl-Diglycolamide in aqueous solutions and extraction systems of varying anions, *Inorg. Chem. Commun.*, 2022, **143**: 109730.

**Optimized geometries for U(IV)-TMDGA Complexes in xyz format. The units of coordinates are angstrom(Å).**

**1. U(IV)-TMDGA**

88

TMDGA

|   |             |             |             |
|---|-------------|-------------|-------------|
| C | 0.12446900  | 3.21050600  | 3.72010600  |
| H | 0.12179400  | 2.71390300  | 4.69576600  |
| H | 0.93375600  | 2.82142500  | 3.10996600  |
| H | 0.25788400  | 4.28421000  | 3.87876400  |
| C | -2.30372500 | 3.76097700  | 3.54114300  |
| H | -2.25209100 | 4.79089500  | 3.17217800  |
| H | -3.25155400 | 3.31240300  | 3.24540900  |
| H | -2.27083000 | 3.78324100  | 4.63323600  |
| C | -1.22389600 | 2.19015300  | 2.02620800  |
| C | -2.52084100 | 1.98470200  | 1.30721800  |
| H | -2.93313000 | 2.93569400  | 0.94480200  |
| H | -3.26849600 | 1.51275500  | 1.95952800  |
| C | -3.33151800 | 0.90937700  | -0.63997700 |
| H | -4.18323900 | 0.54203500  | -0.05302600 |
| H | -3.62582400 | 1.85035600  | -1.12353600 |
| C | -2.88135500 | -0.10588700 | -1.64778000 |
| C | -5.13327600 | -0.14952600 | -2.59259200 |
| H | -5.33014900 | 0.73712100  | -1.99200200 |
| H | -5.41420200 | 0.07662300  | -3.62482900 |
| H | -5.76298400 | -0.97317000 | -2.23880500 |
| C | -3.31866300 | -1.51304700 | -3.55615700 |
| H | -2.25895900 | -1.73121600 | -3.45248400 |
| H | -3.90424300 | -2.43106700 | -3.43943800 |
| H | -3.51122600 | -1.10843900 | -4.55447700 |
| C | -2.71279100 | -2.17497000 | 3.62593800  |
| H | -2.47931500 | -2.56940900 | 4.61902800  |
| H | -2.33390300 | -1.15957600 | 3.54022400  |
| H | -3.79995100 | -2.18598800 | 3.49679900  |
| C | -2.25653300 | -4.47068600 | 2.79371700  |
| H | -3.28498400 | -4.66706900 | 3.10681000  |
| H | -2.08028500 | -5.01879400 | 1.86915500  |
| H | -1.58165700 | -4.83892000 | 3.57384400  |
| C | -1.37130400 | -2.50397200 | 1.65427300  |
| C | -0.68414400 | -3.41018900 | 0.67321100  |
| H | -1.40038600 | -4.01200600 | 0.09948000  |
| H | 0.01364600  | -4.09018600 | 1.17831800  |
| C | 0.82244500  | -3.26936200 | -1.16664200 |
| H | 1.50861800  | -3.94783900 | -0.64420600 |
| H | 0.17216000  | -3.87027900 | -1.81685800 |
| C | 1.57242100  | -2.23060400 | -1.94882500 |
| C | 2.82531300  | -4.04864900 | -3.01325000 |
| H | 3.17921600  | -4.16500200 | -4.03924200 |
| H | 1.95796600  | -4.69677400 | -2.88595900 |
| H | 3.62635900  | -4.34895800 | -2.32980100 |
| C | 3.30957700  | -1.63867600 | -3.49686800 |

|   |             |             |             |
|---|-------------|-------------|-------------|
| H | 3.01245100  | -0.63468300 | -3.20753100 |
| H | 4.35907700  | -1.81435900 | -3.24042300 |
| H | 3.19128300  | -1.75851400 | -4.57763800 |
| C | 3.30322300  | -1.53210100 | 3.36762100  |
| H | 3.63540800  | -1.30080600 | 4.38270100  |
| H | 2.22395800  | -1.66415400 | 3.35751200  |
| H | 3.79979900  | -2.45119500 | 3.03926200  |
| C | 5.01974400  | 0.15996200  | 2.67227400  |
| H | 5.71731300  | -0.64684000 | 2.91031100  |
| H | 5.37586800  | 0.65415300  | 1.76973900  |
| H | 5.01273100  | 0.86896300  | 3.50650200  |
| C | 2.87286400  | -0.03702100 | 1.52805900  |
| C | 3.26567800  | 1.10378700  | 0.64093500  |
| H | 4.11683500  | 0.84249600  | -0.00275000 |
| H | 3.54151100  | 1.98718200  | 1.23057600  |
| C | 2.23102200  | 2.61348000  | -0.88253500 |
| H | 2.31533700  | 3.45432800  | -0.18178800 |
| H | 3.12514600  | 2.59233600  | -1.51693100 |
| C | 0.96188800  | 2.70663100  | -1.70178100 |
| C | 1.79045900  | 4.74871900  | -2.76577000 |
| H | 2.14475300  | 4.69021000  | -3.79959200 |
| H | 1.32139700  | 5.72519200  | -2.61401700 |
| H | 2.64334200  | 4.66964500  | -2.09371900 |
| C | -0.48679400 | 3.87144700  | -3.23773900 |
| H | -1.05960300 | 4.66762800  | -2.75175500 |
| H | -0.28105500 | 4.16611700  | -4.26945500 |
| H | -1.04258800 | 2.93768200  | -3.22887100 |
| N | -1.15952000 | 2.98940700  | 3.05226600  |
| N | -3.73062300 | -0.54271900 | -2.55869000 |
| N | -2.08737300 | -3.02662300 | 2.61858500  |
| N | 2.47528900  | -2.62682200 | -2.80313500 |
| N | 3.67846300  | -0.42262300 | 2.48822500  |
| N | 0.79855500  | 3.69683800  | -2.53031600 |
| O | -0.19469000 | 1.56072300  | 1.61854900  |
| O | -2.21764500 | 1.13427100  | 0.21689000  |
| O | -1.67539700 | -0.50119100 | -1.60117400 |
| O | -1.20203900 | -1.25685800 | 1.51543700  |
| O | 0.03750100  | -2.54969500 | -0.22119800 |
| O | 1.32080800  | -1.01745100 | -1.73556200 |
| O | 1.74690200  | -0.59751000 | 1.33136300  |
| O | 2.12243300  | 1.38415500  | -0.15890900 |
| O | 0.08434800  | 1.80558700  | -1.54473500 |
| U | 0.00821900  | -0.01902300 | -0.06825400 |

## 2. H<sub>2</sub>O-U(IV)-TMDGA

91

TMDGA&H<sub>2</sub>O

|   |            |             |             |
|---|------------|-------------|-------------|
| C | 7.31599600 | 13.52628800 | 15.43405900 |
| H | 7.19825400 | 12.76255300 | 16.20722800 |
| H | 7.51242400 | 13.05423800 | 14.46943100 |
| H | 8.14627000 | 14.18748800 | 15.70748000 |

|   |             |             |             |
|---|-------------|-------------|-------------|
| C | 5.58726500  | 14.83200800 | 16.66606600 |
| H | 6.41870600  | 15.35803200 | 17.14413400 |
| H | 4.75141600  | 15.52219700 | 16.55659700 |
| H | 5.28003100  | 14.00079500 | 17.31023500 |
| C | 5.43868100  | 14.49660300 | 14.19687100 |
| C | 4.11885000  | 15.26532800 | 14.14072500 |
| H | 4.25463400  | 16.30160300 | 14.47246600 |
| H | 3.34948600  | 14.78876000 | 14.76504300 |
| C | 2.48970100  | 15.95515300 | 12.50080200 |
| H | 1.66706700  | 15.46420300 | 13.04246900 |
| H | 2.56640600  | 16.99291000 | 12.83901600 |
| C | 2.26910200  | 15.87405300 | 10.99443700 |
| C | 0.23472300  | 17.28305000 | 11.21363500 |
| H | 0.37065700  | 17.18688000 | 12.28637500 |
| H | 0.31206600  | 18.33838000 | 10.93309500 |
| H | -0.76919300 | 16.92624400 | 10.96322600 |
| C | 0.98608400  | 16.42971600 | 8.98805700  |
| H | 1.84063200  | 15.97127300 | 8.49063100  |
| H | 0.08218200  | 15.83776900 | 8.81364500  |
| H | 0.83370900  | 17.44050600 | 8.59774100  |
| C | 2.63899000  | 10.38328800 | 13.28744500 |
| H | 2.93058100  | 9.36371000  | 13.56087400 |
| H | 3.39797800  | 11.08319900 | 13.62780900 |
| H | 1.67507900  | 10.61110900 | 13.75049200 |
| C | 1.69087200  | 9.38373300  | 11.20203900 |
| H | 0.73360200  | 9.33293000  | 11.72938000 |
| H | 1.49078500  | 9.55947200  | 10.14198100 |
| H | 2.21435700  | 8.42738400  | 11.31835600 |
| C | 3.11875300  | 11.42485100 | 11.11707900 |
| C | 3.03785400  | 11.42993500 | 9.59762500  |
| H | 2.01052300  | 11.58399600 | 9.24618300  |
| H | 3.42052600  | 10.48537500 | 9.17770300  |
| C | 3.97577800  | 12.70155900 | 7.75906300  |
| H | 4.27556200  | 11.76472700 | 7.26295900  |
| H | 2.99076400  | 13.00522600 | 7.37850000  |
| C | 5.00060600  | 13.79373800 | 7.54252600  |
| C | 4.71442600  | 13.61974200 | 5.07788200  |
| H | 5.43867400  | 13.00814200 | 4.52926700  |
| H | 4.41345500  | 14.45987000 | 4.44358600  |
| H | 3.83349300  | 13.01616100 | 5.30204100  |
| C | 6.36080300  | 15.20256000 | 6.09413100  |
| H | 6.97825900  | 15.31815100 | 6.98215600  |
| H | 6.98486200  | 14.89281800 | 5.25188900  |
| H | 5.87443800  | 16.15438000 | 5.84196900  |
| C | 7.80526800  | 9.74184400  | 10.58109200 |
| H | 8.31191200  | 9.15207900  | 11.35133100 |
| H | 6.77607800  | 9.92967900  | 10.88144300 |
| H | 7.83090800  | 9.18639700  | 9.63796100  |
| C | 9.98847600  | 10.91209600 | 10.23473400 |
| H | 10.18817200 | 10.14997500 | 9.47563100  |
| H | 10.43777400 | 11.84757200 | 9.89980400  |

|   |             |             |             |
|---|-------------|-------------|-------------|
| H | 10.45472300 | 10.60119900 | 11.17478400 |
| C | 7.85411100  | 12.18139300 | 10.45891700 |
| C | 8.61833100  | 13.48194700 | 10.27955500 |
| H | 9.02194400  | 13.57044300 | 9.26096100  |
| H | 9.43767200  | 13.57749500 | 11.00653800 |
| C | 8.21689300  | 15.86385100 | 10.31675900 |
| H | 9.04608400  | 16.01819800 | 11.02180000 |
| H | 8.60920300  | 15.97365300 | 9.29302300  |
| C | 7.07553900  | 16.82721500 | 10.56432800 |
| C | 8.64770200  | 18.69386800 | 10.20826600 |
| H | 8.50877100  | 19.71055000 | 9.83726100  |
| H | 9.24983800  | 18.73327600 | 11.12255200 |
| H | 9.15295800  | 18.11238800 | 9.43026000  |
| C | 6.22725300  | 19.12759000 | 10.74281000 |
| H | 5.30508300  | 18.62258800 | 11.01619500 |
| H | 6.52442500  | 19.80295600 | 11.55305100 |
| H | 6.07165000  | 19.71969300 | 9.83638200  |
| N | 6.06112500  | 14.31123500 | 15.35319200 |
| N | 1.23357900  | 16.49376600 | 10.44413100 |
| N | 2.51374000  | 10.45700400 | 11.80487800 |
| N | 5.33324800  | 14.16698500 | 6.31298600  |
| N | 8.51655000  | 11.03017900 | 10.41411400 |
| N | 7.30535400  | 18.13133700 | 10.49494300 |
| O | 5.92437800  | 14.07205400 | 13.07212800 |
| O | 3.72203100  | 15.25087300 | 12.75581800 |
| O | 3.11978800  | 15.19947100 | 10.30359500 |
| O | 3.77781000  | 12.35787700 | 11.69827100 |
| O | 3.91231800  | 12.50645800 | 9.18773300  |
| O | 5.51845000  | 14.32634900 | 8.59556700  |
| O | 6.58729300  | 12.23875900 | 10.63540200 |
| O | 7.65843500  | 14.52828100 | 10.51865400 |
| O | 5.91150400  | 16.33761300 | 10.84758000 |
| U | 5.13506100  | 14.09592400 | 10.87345500 |
| O | 9.24446500  | 16.82947200 | 7.40237000  |
| H | 10.13313600 | 16.60908200 | 7.10824400  |
| H | 9.03180300  | 17.63374700 | 6.90649600  |

### 3. Cl-U(IV)-TMDGA

89

TMDGA&Cl-

|    |             |             |             |
|----|-------------|-------------|-------------|
| Cl | -0.16085400 | -0.12425300 | -2.75010500 |
| C  | 1.01642800  | 3.26852900  | 3.79035400  |
| H  | 0.57780100  | 3.45585500  | 4.77483700  |
| H  | 1.25574600  | 2.21235500  | 3.68902000  |
| H  | 1.92393500  | 3.87199400  | 3.68798900  |
| C  | -0.52841600 | 4.99907900  | 2.90293300  |
| H  | 0.27425300  | 5.69291200  | 3.16514600  |
| H  | -0.98289800 | 5.34816000  | 1.97602500  |
| H  | -1.27505200 | 5.00954900  | 3.70417700  |
| C  | -0.29600000 | 2.80002100  | 1.79418900  |
| C  | -1.35407400 | 3.21307500  | 0.77320700  |

|   |             |             |             |
|---|-------------|-------------|-------------|
| H | -0.95966800 | 3.98210700  | 0.09604000  |
| H | -2.25284600 | 3.60184000  | 1.26653400  |
| C | -2.79578200 | 2.16284600  | -0.82826500 |
| H | -3.63865100 | 2.61290300  | -0.28866200 |
| H | -2.53738600 | 2.80367600  | -1.68073700 |
| C | -3.12983200 | 0.74232100  | -1.28210500 |
| C | -5.02161800 | 1.61278300  | -2.62440500 |
| H | -4.81692600 | 2.56915700  | -2.14543700 |
| H | -4.88870800 | 1.72125700  | -3.70532500 |
| H | -6.06245300 | 1.34227600  | -2.42298500 |
| C | -4.44263700 | -0.79608700 | -2.63232900 |
| H | -3.60478500 | -1.45769700 | -2.42465500 |
| H | -5.35485000 | -1.17883600 | -2.16242700 |
| H | -4.59969900 | -0.73623400 | -3.71245400 |
| C | -3.27811200 | -1.03482700 | 3.75401900  |
| H | -3.19001500 | -1.55095900 | 4.71454100  |
| H | -2.51865400 | -0.25955800 | 3.68134700  |
| H | -4.27605400 | -0.59097600 | 3.68223800  |
| C | -3.93218900 | -3.21314100 | 2.75791900  |
| H | -4.95402600 | -2.90874200 | 2.99893900  |
| H | -3.95760900 | -3.75910000 | 1.81530600  |
| H | -3.56741500 | -3.87296400 | 3.55220300  |
| C | -2.19256100 | -1.79842100 | 1.71372500  |
| C | -1.98916000 | -2.85317000 | 0.62728100  |
| H | -2.86077400 | -2.89665300 | -0.03751000 |
| H | -1.81959000 | -3.84563200 | 1.06128400  |
| C | -0.35519700 | -3.39174200 | -1.05431800 |
| H | -0.30971400 | -4.38691700 | -0.59511400 |
| H | -1.02774100 | -3.42472200 | -1.92001200 |
| C | 1.03789800  | -2.90680400 | -1.45686200 |
| C | 1.27906200  | -4.86666800 | -2.95274800 |
| H | 1.13274500  | -4.71514000 | -4.02679200 |
| H | 0.34510900  | -5.21625100 | -2.51556800 |
| H | 2.03971800  | -5.63909400 | -2.80591900 |
| C | 3.05344700  | -3.14964900 | -2.79861100 |
| H | 3.23733400  | -2.14807300 | -2.41758800 |
| H | 3.83202600  | -3.83550500 | -2.44923500 |
| H | 3.06066700  | -3.13254700 | -3.89212400 |
| C | 2.31228600  | -2.40463300 | 3.82152800  |
| H | 2.67174200  | -2.11513800 | 4.81330500  |
| H | 1.27216000  | -2.10844600 | 3.70536400  |
| H | 2.40848400  | -3.48984300 | 3.71460100  |
| C | 4.58420400  | -1.87207100 | 2.97553800  |
| H | 4.80984400  | -2.91732200 | 3.20257300  |
| H | 5.12744200  | -1.60006400 | 2.07111800  |
| H | 4.92924900  | -1.25116700 | 3.80909500  |
| C | 2.55926800  | -1.03036000 | 1.82783800  |
| C | 3.44226000  | -0.30235700 | 0.81659700  |
| H | 3.95615800  | -1.02259900 | 0.16696800  |
| H | 4.19125200  | 0.32297600  | 1.31755800  |
| C | 3.21443900  | 1.36270500  | -0.88846100 |

|   |             |             |             |
|---|-------------|-------------|-------------|
| H | 3.98045800  | 1.96708400  | -0.38534800 |
| H | 3.69587500  | 0.76521000  | -1.67378400 |
| C | 2.10950400  | 2.24472400  | -1.46676100 |
| C | 3.76010400  | 3.40544900  | -2.89755200 |
| H | 3.82733300  | 3.10462600  | -3.94768100 |
| H | 3.96851000  | 4.47675200  | -2.82391400 |
| H | 4.51468600  | 2.86872300  | -2.32439100 |
| C | 1.34497200  | 3.95324500  | -3.01986800 |
| H | 1.41121000  | 4.98832000  | -2.66884700 |
| H | 1.48505100  | 3.93723000  | -4.10384800 |
| H | 0.37355500  | 3.53102500  | -2.77363200 |
| N | 0.04647700  | 3.65297000  | 2.75432300  |
| N | -4.13998000 | 0.54848800  | -2.12326900 |
| N | -3.09197900 | -2.00914200 | 2.66826700  |
| N | 1.73860500  | -3.61311100 | -2.33688100 |
| N | 3.13049600  | -1.73196000 | 2.80182100  |
| N | 2.40253200  | 3.14471200  | -2.39539100 |
| O | 0.21533000  | 1.65222200  | 1.68659600  |
| O | -1.67996400 | 2.03199500  | 0.04993000  |
| O | -2.41594100 | -0.19207600 | -0.83119700 |
| O | -1.48356800 | -0.75670200 | 1.66027300  |
| O | -0.83091200 | -2.44708900 | -0.09587700 |
| O | 1.46120600  | -1.84501700 | -0.92426600 |
| O | 1.30857200  | -0.93581800 | 1.70140000  |
| O | 2.56641300  | 0.51888100  | 0.05541900  |
| O | 0.93955800  | 2.06559500  | -1.02434000 |
| U | -0.01902900 | 0.00475800  | -0.10579400 |

#### 4. NO<sub>3</sub><sup>-</sup>-U(IV)-TMDGA (monodentate)

92

TMDGA&NO<sub>3</sub><sup>-</sup> (mono)

|   |            |             |             |
|---|------------|-------------|-------------|
| O | 0.62434600 | -0.16027400 | -2.18088500 |
| C | 2.33885600 | -0.46943600 | 4.53925100  |
| H | 2.16574100 | -0.06177400 | 5.53950300  |
| H | 1.43808900 | -0.96344200 | 4.18204600  |
| H | 3.16558100 | -1.18511300 | 4.58843000  |
| C | 3.77546600 | 1.50644300  | 4.09932100  |
| H | 4.59116300 | 0.88258500  | 4.47406400  |
| H | 4.16932100 | 2.12918300  | 3.29679900  |
| H | 3.42029000 | 2.14469600  | 4.91523700  |
| C | 2.03132400 | 0.80801500  | 2.48969200  |
| C | 2.39121500 | 1.99087100  | 1.59282600  |
| H | 3.39108600 | 1.86226900  | 1.15953500  |
| H | 2.36611400 | 2.93291300  | 2.15385500  |
| C | 1.45390500 | 3.19361400  | -0.25620700 |
| H | 1.37523500 | 4.08568800  | 0.37941100  |
| H | 2.39318200 | 3.22693400  | -0.81695600 |
| C | 0.26142200 | 3.09047100  | -1.20017200 |
| C | 1.04082000 | 5.12679100  | -2.34461700 |
| H | 1.57226100 | 5.38819400  | -1.42937400 |
| H | 1.76052400 | 4.85343600  | -3.12361800 |



|   |             |             |             |
|---|-------------|-------------|-------------|
| H | 0.48223400  | 6.00696800  | -2.67010700 |
| C | -0.98185500 | 3.91648200  | -3.12165300 |
| H | -1.56278200 | 3.01679400  | -2.93349700 |
| H | -1.62564800 | 4.79919700  | -3.06537100 |
| H | -0.53698900 | 3.86290400  | -4.12014200 |
| C | -2.26594900 | 2.87618700  | 3.65486700  |
| H | -2.90849700 | 2.69296900  | 4.52084500  |
| H | -1.38897200 | 2.23464800  | 3.70514000  |
| H | -1.96366700 | 3.92839200  | 3.65687300  |
| C | -4.35587100 | 3.19532300  | 2.35303800  |
| H | -4.27779800 | 4.23547700  | 2.67972500  |
| H | -4.74456800 | 3.19223100  | 1.33518300  |
| H | -5.05558600 | 2.67279100  | 3.01387700  |
| C | -2.51601000 | 1.77937300  | 1.49583600  |
| C | -3.35548700 | 1.44596400  | 0.26505500  |
| H | -3.45243700 | 2.32712500  | -0.38402700 |
| H | -4.35870300 | 1.10373500  | 0.54706400  |
| C | -3.33965600 | -0.10737300 | -1.54890100 |
| H | -4.33892000 | -0.46304700 | -1.26483300 |
| H | -3.45034300 | 0.67222200  | -2.31443800 |
| C | -2.46986700 | -1.25765600 | -2.05244500 |
| C | -4.06959000 | -1.70052600 | -3.88747700 |
| H | -4.60873300 | -2.64737800 | -3.98528900 |
| H | -3.83297400 | -1.32549600 | -4.88795700 |
| H | -4.71911800 | -0.98589300 | -3.38380600 |
| C | -1.95665300 | -2.98968700 | -3.67745000 |
| H | -0.95378200 | -2.87774000 | -3.27072800 |
| H | -2.36355300 | -3.97428600 | -3.42400100 |
| H | -1.92197900 | -2.89154000 | -4.76523600 |
| C | -3.01634600 | -2.99731700 | 3.04734000  |
| H | -2.92054500 | -3.38360100 | 4.06630400  |
| H | -2.88961500 | -1.91709000 | 3.05000900  |
| H | -4.00694400 | -3.25947100 | 2.66251200  |
| C | -1.90251500 | -5.07896700 | 2.27619700  |
| H | -2.91820800 | -5.48166900 | 2.25277900  |
| H | -1.35756900 | -5.49637400 | 1.42983300  |
| H | -1.42420700 | -5.39110900 | 3.21070400  |
| C | -1.15839300 | -2.85845800 | 1.47988200  |
| C | -0.05374400 | -3.53183400 | 0.66703800  |
| H | -0.47717600 | -4.08006200 | -0.18481600 |
| H | 0.52448100  | -4.22888200 | 1.28499700  |
| C | 2.01537400  | -2.92415000 | -0.38478900 |
| H | 2.49770900  | -3.65690900 | 0.27358000  |
| H | 1.81876800  | -3.39393300 | -1.35671600 |
| C | 2.87977700  | -1.67587300 | -0.54900900 |
| C | 4.69474100  | -3.07011200 | -1.47855800 |
| H | 4.66406100  | -3.12980500 | -2.57158200 |
| H | 5.73665500  | -3.10984600 | -1.15122300 |
| H | 4.17390700  | -3.92782900 | -1.05416800 |
| C | 4.92937100  | -0.61062800 | -1.31859400 |
| H | 5.83755800  | -0.64045100 | -0.70915500 |

|   |             |             |             |
|---|-------------|-------------|-------------|
| H | 5.20298200  | -0.61737700 | -2.37719300 |
| H | 4.35878500  | 0.28966800  | -1.10489700 |
| N | 2.69130800  | 0.63040800  | 3.62883300  |
| N | 0.08977900  | 4.02541200  | -2.12320200 |
| N | -3.02215000 | 2.57851500  | 2.42956900  |
| N | -2.82495600 | -1.93090700 | -3.13856300 |
| N | -1.97954200 | -3.61115200 | 2.20437500  |
| N | 4.10842000  | -1.79715100 | -1.03287100 |
| O | 1.10490200  | 0.04028700  | 2.11029500  |
| O | 1.40894300  | 2.02302600  | 0.56189500  |
| O | -0.53930900 | 2.12285300  | -1.03473100 |
| O | -1.36121800 | 1.27910100  | 1.58079900  |
| O | -2.66333700 | 0.40445700  | -0.40793600 |
| O | -1.42172500 | -1.51613300 | -1.39722900 |
| O | -1.24684900 | -1.60064100 | 1.43254600  |
| O | 0.79403100  | -2.48312100 | 0.21004900  |
| O | 2.37349400  | -0.56819200 | -0.21031300 |
| U | -0.05416700 | -0.03037700 | -0.00638400 |
| N | 1.74936800  | 0.29457800  | -2.76329000 |
| O | 2.03514400  | 1.48171100  | -2.60151800 |
| O | 2.39524100  | -0.51422700 | -3.40279600 |

**5. NO<sub>3</sub><sup>-</sup>-U(IV)-TMDGA (bidentate)**

92

TMDGA&NO<sub>3</sub><sup>-</sup> (bi)

|   |             |             |             |
|---|-------------|-------------|-------------|
| O | 0.54111800  | -1.83145700 | -1.90436200 |
| C | -0.74320900 | 2.86030700  | 4.02929200  |
| H | -0.83349400 | 2.69570700  | 5.10706600  |
| H | 0.10743400  | 2.30395000  | 3.64145500  |
| H | -0.60829200 | 3.93181700  | 3.84804700  |
| C | -3.22382000 | 2.87928600  | 3.96815100  |
| H | -3.11270100 | 3.94294700  | 4.19409200  |
| H | -4.06513000 | 2.76881600  | 3.28494800  |
| H | -3.43629200 | 2.34434300  | 4.89997800  |
| C | -1.91192200 | 1.56441700  | 2.33131900  |
| C | -3.21131900 | 1.04874700  | 1.71737400  |
| H | -3.71927500 | 1.86127700  | 1.17541600  |
| H | -3.89509300 | 0.66901300  | 2.48778200  |
| C | -3.83900800 | -0.48517600 | 0.00497100  |
| H | -4.56066000 | -1.07893400 | 0.58138300  |
| H | -4.38539800 | 0.33009100  | -0.49314300 |
| C | -3.11013200 | -1.33986500 | -1.02926100 |
| C | -5.26056200 | -2.17504200 | -1.91530500 |
| H | -5.72264800 | -1.40240600 | -1.30225200 |
| H | -5.59126400 | -2.03732300 | -2.94855100 |
| H | -5.59413000 | -3.15866200 | -1.56942900 |
| C | -3.09793800 | -2.94476800 | -2.86180700 |
| H | -2.03191400 | -2.96368200 | -2.64676800 |
| H | -3.50692500 | -3.95748800 | -2.80715200 |
| H | -3.26742700 | -2.54810100 | -3.86773000 |
| C | -1.82880700 | -3.26931800 | 3.47172200  |

|   |             |             |             |
|---|-------------|-------------|-------------|
| H | -1.69696800 | -3.18006000 | 4.55442700  |
| H | -2.18842200 | -2.32878000 | 3.06094500  |
| H | -2.54869400 | -4.06787300 | 3.26868100  |
| C | 0.06788600  | -4.86089500 | 3.33841900  |
| H | -0.67299000 | -5.66237400 | 3.27200000  |
| H | 0.93444500  | -5.14749400 | 2.74489300  |
| H | 0.36889500  | -4.74553200 | 4.38457100  |
| C | 0.01170800  | -2.81697400 | 1.94583500  |
| C | 1.35500500  | -3.18662400 | 1.32909000  |
| H | 1.25597200  | -4.09761400 | 0.72146100  |
| H | 2.11393100  | -3.36454800 | 2.10179500  |
| C | 2.89237400  | -2.34781800 | -0.26793800 |
| H | 3.74662100  | -2.54276700 | 0.39408600  |
| H | 2.72662000  | -3.22704600 | -0.90214600 |
| C | 3.14327000  | -1.11325100 | -1.12890000 |
| C | 5.08585600  | -2.26296000 | -2.15437600 |
| H | 6.10745900  | -1.87748000 | -2.20962300 |
| H | 4.86038200  | -2.79669800 | -3.08359700 |
| H | 5.03212800  | -2.95861000 | -1.31804900 |
| C | 4.38541600  | -0.00983400 | -2.90965000 |
| H | 3.52869300  | 0.66017300  | -2.88433800 |
| H | 5.29571300  | 0.53003700  | -2.62875200 |
| H | 4.50868000  | -0.40465200 | -3.92201900 |
| C | 3.80297800  | 1.02655100  | 3.29065100  |
| H | 3.84498100  | 1.63373200  | 4.20002100  |
| H | 3.00198900  | 0.29525200  | 3.37357700  |
| H | 4.76377200  | 0.51715900  | 3.16547600  |
| C | 4.47068400  | 3.04371500  | 2.00824700  |
| H | 5.49022900  | 2.69375700  | 2.18952200  |
| H | 4.43876400  | 3.47729700  | 1.00902800  |
| H | 4.23069400  | 3.81467000  | 2.74842200  |
| C | 2.52876400  | 1.67123400  | 1.31638700  |
| C | 2.27599100  | 2.63794400  | 0.15917300  |
| H | 3.06615700  | 2.55123200  | -0.59659800 |
| H | 2.22993900  | 3.67558600  | 0.51086700  |
| C | 0.52104400  | 3.15487700  | -1.39683000 |
| H | 0.57905000  | 4.18911200  | -1.03544300 |
| H | 1.11433100  | 3.06198400  | -2.31477100 |
| C | -0.93018600 | 2.73694400  | -1.63461200 |
| C | -1.18560200 | 4.57665300  | -3.27347700 |
| H | -1.15803200 | 4.32429600  | -4.33811600 |
| H | -1.87401200 | 5.41408800  | -3.12688700 |
| H | -0.19091300 | 4.88885300  | -2.95977800 |
| C | -3.04579000 | 3.01502200  | -2.80505600 |
| H | -3.73774400 | 3.79639600  | -2.47487000 |
| H | -3.15205300 | 2.88119600  | -3.88548000 |
| H | -3.26708200 | 2.07986200  | -2.29654100 |
| N | -1.97005600 | 2.39369100  | 3.37107800  |
| N | -3.79247500 | -2.10055500 | -1.87430600 |
| N | -0.53935800 | -3.61097200 | 2.85381600  |
| N | 4.16115500  | -1.13130500 | -1.98644200 |

|   |             |             |             |
|---|-------------|-------------|-------------|
| N | 3.55250200  | 1.90201500  | 2.13686100  |
| N | -1.66548500 | 3.41737000  | -2.50589200 |
| O | -0.82026600 | 1.18414700  | 1.83081800  |
| O | -2.81990100 | 0.02015500  | 0.83840300  |
| O | -1.84859600 | -1.28639800 | -1.04070800 |
| O | -0.54221200 | -1.74909600 | 1.55074500  |
| O | 1.73241400  | -2.08580600 | 0.51674500  |
| O | 2.37688900  | -0.12032700 | -1.00289800 |
| O | 1.75190200  | 0.69121300  | 1.44999100  |
| O | 1.01644000  | 2.27083100  | -0.39431600 |
| O | -1.36946300 | 1.75195400  | -0.97647400 |
| U | 0.00685300  | -0.09835400 | -0.09808100 |
| N | 0.39076200  | -1.01160700 | -2.87709700 |
| O | 0.51231700  | -1.31150500 | -4.03534200 |
| O | 0.08995600  | 0.19560700  | -2.49649100 |

## 6. 3ClO<sub>4</sub>-U(IV)-TMDGA

103

TMDGA&3ClO<sub>4</sub>-

|    |             |             |             |
|----|-------------|-------------|-------------|
| Cl | 6.27010047  | 23.82860186 | 11.04090086 |
| O  | 5.81990043  | 24.76190193 | 12.05050094 |
| O  | 5.28200041  | 22.82660177 | 10.81470082 |
| O  | 7.41130057  | 23.25750181 | 11.62800090 |
| O  | 6.47520052  | 24.57250188 | 9.91850078  |
| Cl | 14.80750112 | 26.22310203 | 6.86180054  |
| O  | 15.86040123 | 25.31730197 | 7.18500057  |
| O  | 14.64890115 | 26.30350204 | 5.46510042  |
| O  | 15.15940119 | 27.53680212 | 7.34030054  |
| O  | 13.59150102 | 25.81320196 | 7.49090058  |
| C  | 7.78470058  | 20.54020156 | 8.79340068  |
| H  | 6.92560053  | 20.94140163 | 8.64280065  |
| H  | 8.45960065  | 21.05100160 | 8.33940063  |
| H  | 7.78070058  | 19.64130150 | 8.45740065  |
| C  | 7.06790052  | 19.86230153 | 11.05010088 |
| H  | 6.96090051  | 18.95410145 | 10.76010084 |
| H  | 7.35510057  | 19.87530151 | 11.96500092 |
| H  | 6.22980050  | 20.32480155 | 10.97120086 |
| C  | 9.10840069  | 21.14010160 | 10.69980083 |
| C  | 9.37600070  | 21.09930161 | 12.18190094 |
| H  | 9.52100072  | 20.18730156 | 12.47870096 |
| H  | 8.62670064  | 21.47070165 | 12.67390095 |
| C  | 10.86820085 | 22.04090167 | 13.74960108 |
| H  | 10.17110079 | 22.53310171 | 14.21120107 |
| H  | 10.97270082 | 21.17540164 | 14.17810109 |
| C  | 12.15020095 | 22.79690175 | 13.77890105 |
| C  | 12.24680093 | 22.59630172 | 16.19240127 |
| H  | 12.72200099 | 21.81060167 | 16.46730128 |
| H  | 12.36820097 | 23.29090178 | 16.84410131 |
| H  | 11.31210087 | 22.39380172 | 16.11140122 |
| C  | 14.01320110 | 23.75900182 | 14.90300116 |
| H  | 13.84610105 | 24.70250189 | 14.94080114 |

|   |             |             |             |
|---|-------------|-------------|-------------|
| H | 14.53540109 | 23.49520183 | 15.66640120 |
| H | 14.49490109 | 23.55090181 | 14.09950107 |
| C | 12.99100100 | 18.17030141 | 10.82410081 |
| H | 12.94270098 | 17.91950140 | 11.74990090 |
| H | 12.15940096 | 18.56770141 | 10.55680084 |
| H | 13.15940102 | 17.39020133 | 10.29150079 |
| C | 15.42310117 | 18.58820142 | 10.63550082 |
| H | 15.54320117 | 18.03470138 | 9.86000077  |
| H | 16.05890123 | 19.30690149 | 10.61610081 |
| H | 15.55620120 | 18.06250139 | 11.42740087 |
| C | 13.80560105 | 20.40460158 | 10.56360082 |
| C | 14.92310116 | 21.40570164 | 10.49580083 |
| H | 15.50790119 | 21.21630164 | 9.74420075  |
| H | 15.44790116 | 21.38900166 | 11.31090086 |
| C | 15.21290117 | 23.74220182 | 10.22350077 |
| H | 15.87350123 | 23.69580181 | 10.93300083 |
| H | 15.67110120 | 23.71250185 | 9.36860074  |
| C | 14.40220109 | 24.99970191 | 10.34170082 |
| C | 16.44530127 | 26.30720205 | 10.29420081 |
| H | 16.64630126 | 27.05760206 | 9.72970077  |
| H | 16.82130129 | 26.45400201 | 11.16520084 |
| H | 16.82130129 | 25.51040198 | 9.91340079  |
| C | 14.21810107 | 27.37520213 | 10.55150081 |
| H | 13.29510101 | 27.15230209 | 10.68630083 |
| H | 14.54060111 | 27.87300213 | 11.30700087 |
| H | 14.30690109 | 27.90640215 | 9.75790073  |
| C | 13.35650102 | 22.54430174 | 5.79790047  |
| H | 14.10190110 | 23.06250179 | 5.48680045  |
| H | 13.60320102 | 22.07990172 | 6.60080053  |
| H | 13.10320102 | 21.90910166 | 5.12430040  |
| C | 11.78210092 | 24.29390186 | 4.96450038  |
| H | 11.89960091 | 23.83330185 | 4.13170032  |
| H | 10.85390084 | 24.50560186 | 5.08460039  |
| H | 12.29770096 | 25.10370191 | 4.95810038  |
| C | 11.76510088 | 23.53240182 | 7.27090053  |
| C | 10.69330084 | 24.53530188 | 7.54480056  |
| H | 9.87610077  | 24.29390186 | 7.08150054  |
| H | 10.97010086 | 25.41760196 | 7.24860058  |
| C | 9.53920071  | 25.49370194 | 9.39490075  |
| H | 9.78600073  | 26.37780202 | 9.07890070  |
| H | 8.65670065  | 25.27830193 | 9.05640072  |
| C | 9.55490072  | 25.44910198 | 10.89020081 |
| C | 7.91130063  | 27.25070212 | 10.92020083 |
| H | 7.81340061  | 27.03530205 | 9.98940075  |
| H | 7.05100056  | 27.23220208 | 11.34580089 |
| H | 8.29380063  | 28.12550217 | 11.00830085 |
| C | 8.81990066  | 26.29240202 | 13.00500102 |
| H | 9.25200072  | 27.09660210 | 13.30280102 |
| H | 7.92170060  | 26.26820200 | 13.34070101 |
| H | 9.30290074  | 25.52900198 | 13.33150105 |
| N | 8.06530063  | 20.52350157 | 10.21610081 |

|    |             |             |             |
|----|-------------|-------------|-------------|
| N  | 12.75600100 | 23.04390179 | 14.91020115 |
| N  | 14.07580107 | 19.13420148 | 10.63680080 |
| N  | 14.99490115 | 26.15680199 | 10.40790079 |
| N  | 12.23640096 | 23.42650181 | 6.07620045  |
| N  | 8.79640070  | 26.26260204 | 11.55970089 |
| O  | 9.94130076  | 21.75880167 | 9.96770077  |
| O  | 10.54450080 | 21.88160170 | 12.38900097 |
| O  | 12.64370096 | 23.19550176 | 12.67480097 |
| O  | 12.62670098 | 20.84280162 | 10.54740080 |
| O  | 14.29120109 | 22.67260172 | 10.33150082 |
| O  | 13.13980103 | 24.88710193 | 10.37210078 |
| O  | 12.19330095 | 22.83570177 | 8.23660065  |
| O  | 10.49220078 | 24.52290188 | 8.95680067  |
| O  | 10.33040082 | 24.61130189 | 11.44150090 |
| U  | 11.79370090 | 23.03220179 | 10.53200079 |
| Cl | 14.57580113 | 19.73600153 | 14.30300110 |
| O  | 15.69850120 | 20.23560158 | 13.70720107 |
| O  | 14.48970113 | 18.33180139 | 14.10140108 |
| O  | 14.54060111 | 20.05920156 | 15.69220119 |
| O  | 13.44130104 | 20.25230157 | 13.67320107 |
